1 *The effect of mentorship as a means of strengthening leadership in the health system at the*  
2 *operational level: a case study of the Walungu rural health zone in the eastern Democratic*  
3 *Republic of Congo*

4  
5 Rosine Bigirinama<sup>1,2,3,\*</sup>, Ghislain Bisimwa<sup>1,2,4</sup>, Samuel Makali<sup>1,5</sup>, Aimé Cikomola<sup>1</sup>, Janvier  
6 Barhobagayana<sup>6</sup>, Jean-Corneille Lembebu<sup>1</sup>, Christian Chiribagula<sup>1</sup>, Pacifique Mwene-Batu<sup>1,7</sup>,  
7 Abdon Mukalay<sup>3</sup>, Denis Porignon<sup>8</sup>, Albert Tambwe<sup>3</sup>.

8  
9 <sup>1</sup> Ecole Régionale de Santé Publique, Université Catholique de Bukavu, Bukavu, Democratic  
10 Republic of Congo

11 <sup>2</sup> School of Medicine, Université Catholique de Bukavu, Bukavu, Democratic Republic of  
12 Congo

13 <sup>3</sup> Ecole de Santé Publique, University of Lubumbashi, Lubumbashi, Democratic Republic of  
14 Congo

15 <sup>4</sup> Centre de Recherche en Sciences Naturelles, Lwiro, Democratic Republic of Congo

16 <sup>5</sup> Centre de Recherche (CR3) Politiques et Systèmes de Santé- Santé internationale, École de  
17 Santé Publique, Université Libre de Bruxelles, Belgique

18 <sup>6</sup> Department of Public Health, College of Health Sciences, Université Officielle de Bukavu,  
19 Bukavu, Democratic Republic of Congo

20 <sup>7</sup> School of Medicine, Université de Kaziba, Bukavu, Democratic Republic of Congo

21 <sup>8</sup> Département des Sciences de la Santé Publique, School of Medicine, Université de Liège,  
22 Liège, Belgium

23 \*Corresponding Author: Rosine N. Bigirinama, Université Catholique de Bukavu, Avenue  
24 Michombero No. 02, Bukavu, Democratic Republic of the Congo. Mail to:

25 [rosinebigirinama@gmail.com](mailto:rosinebigirinama@gmail.com)

NOTE: This preprint reports new research that has not been certified by peer review and should not be used to guide clinical practice.

26

## 27 **Abstract**

28

29 **Context:** In the rural Health Zone (HZ) of Walungu, eastern Democratic Republic of Congo,  
30 major constraints impede health outcomes. From 2015 to 2019, the "RIPSEC" program  
31 transformed Walungu into a Learning and Research Zone (LRZ) under the mentorship of a  
32 local university to enhance the leadership capabilities of HZ managers, focusing on managing  
33 challenges including the proliferation of Informal Healthcare Facilities (IHF).

34

35 **Objective:** This study evaluates the impact of RIPSEC mentorship on leadership  
36 development and the performance of the Walungu LRZ, particularly concerning the  
37 utilization of integrated curative health services in competition with IHFs.

38

39 **Methods:** We used a mixed method approach, combining retrospective analysis of some key  
40 health indicators before (2014) and during RIPSEC program (2015-2019), and in-depth  
41 qualitative interviews with members of the HZ management team. Quantitative data were  
42 presented as frequencies and proportions. Simple linear regression ( $p < 0.05$ ) measured the  
43 influence of IHFs on service use. The functionality and performance of the HZ were assessed  
44 using an internal benchmarking approach, with results presented as trend curves. Deductive  
45 analysis of interviews allowed for a deeper exploration of quantitative trends.

46

47 **Results:** Despite efforts to manage them, IHFs negatively influenced the use of curative  
48 services. RIPSEC mentorship notably enhanced the leadership skills of managers, leading to  
49 improved management effectiveness. While the use of curative health services slightly

50 increased during the program, rates remained below 50%, and gains were not sustained post-  
51 program.

52

53 **Conclusion:** RIPSEC mentorship has positively impacted leadership and performance in  
54 Walungu. However, challenges related to sustainability and financing persist, necessitating  
55 comprehensive interventions beyond enhancing managerial leadership solely.

56

57 **Key words:** Leadership, Mentorship, Public Health, Crisis, Learning and Research Site,  
58 DRC.

59

## 60 **Introduction**

61

62 In contexts of prolonged multifaceted crises, healthcare systems face colossal challenges,  
63 progressively undermining their ability to provide quality healthcare to the population (1,2). In  
64 2021, 4.5 billion people lacked coverage by essential health services, and 1 billion faced  
65 catastrophic healthcare costs, with 344 million people living in extreme poverty due to these  
66 expenses. (3). This reality is starkly evident in the east of the Democratic Republic of Congo  
67 (DRC), where decades of armed conflict have fostered a persistent crisis (4). The ongoing  
68 conflict has gradually eroded infrastructure and led to an inadequate distribution of healthcare  
69 resources (1), while the state struggles to finance quality, accessible health services for all. With  
70 less than 15% of the national budget allocated to health, and only 30% of this amount disbursed,  
71 the majority of healthcare financing falls on households, which contribute 40% of the overall  
72 health budget, 90% of which is through direct payments (5–8). As a result, health facilities  
73 commonly rely on direct payment for care by patients to ensure their operation (7,8). These

74 financial constraints significantly deter the sick from using healthcare services (9), contributing  
75 to the population's growing impoverishment and poor health outcomes.

76

77 Moreover, the limited government presence in crisis zones (10) has led to the proliferation of  
78 Informal Healthcare Facilities (IHF). These facilities operate marginally within legal  
79 frameworks, often failing to meet sectoral standards and posing risks to patient safety (11).  
80 Despite these issues, economic constraints and often misleading promises draw people to these  
81 facilities (12). The inability of the state to effectively regulate these entities is further  
82 complicated by political interferences that undermine the regulatory attempts of HZ managers  
83 (11,13). However, strengthening Health Zone (HZ) management is recognized as a pivotal  
84 strategy for addressing these challenges, as demonstrated in various contexts, including those  
85 similar to the east of the DRC (15-18).

86

87 In the DRC, the organizational arrangements of the health system are such that leadership must  
88 be exercised fully at the lowest level of the health system, through the HZ managers gathered  
89 in a Health Zone Management Team (HZMT) (18). The HZMT is responsible for managing and  
90 coordinating health services, planning interventions, conducting epidemiological surveillance,  
91 and supporting primary care structures. They also have the task of ensuring the effective  
92 implementation of national health policies (18,19). Previous studies in eastern DRC have  
93 identified a notable leadership deficit among managers in crisis zones, with no formal  
94 government program currently aimed at enhancing HZ management leadership (11,20). In  
95 2015, an evidence-based health system strengthening program named "Renforcement  
96 Institutionnel pour des Politiques de Santé basées sur l'Évidence en RD Congo" (RIPSEC) was  
97 established in the Walungu HZ, South-Kivu province, targeting it as a "demonstration health  
98 zone," a strategy proposed in the DRC's National Health System Strengthening Strategy but

99 not yet implemented (18). Walungu was selected since it met key selection criteria: it presented  
100 a minimally acceptable level of functionality, was geographically accessible, and had favorable  
101 security conditions. These criteria ensured that the selected zone could provide a safe, stable,  
102 and accessible environment for effective HZMT mentoring. Walungu was positioned to serve  
103 as a model for other HZs, demonstrating viable strategies for developing and improving health  
104 services.

105  
106 This study is based on the hypothesis that leadership development through the “demonstration  
107 health zone” approach can effectively address the challenges in crisis-affected areas. It  
108 specifically examines the impact of RIPSEC mentorship on the leadership capabilities of the  
109 Walungu HZMT in the face of competition from IHFs.

110

## 111 **Methodology**

112

### 113 **Study region: presentation of the case under study**

114 The study was conducted in the Walungu HZ in the South-Kivu province of eastern Democratic  
115 Republic of Congo (DRC). Walungu is one of 519 operational HZs (also known as Health  
116 Districts) that form the foundational layer of the DRC’s health system pyramid. Each HZ is  
117 structured to provide two primary healthcare service lines. The first line consists of a network  
118 of 7 to 25 Health Centers (HCs), each serving its corresponding geographical entity, known as  
119 a Health Area (HA), and delivering a minimum package of care. The second line is typically  
120 represented by a General Referral Hospital (GRH) that offers a complementary package of care.  
121 Some HZs also include secondary hospitals or Referral Health Centers that provide a level of  
122 care between the first and second lines. The intermediate coordinating level of the health system

123 pyramid comprises 26 Provincial Health Divisions (DPS), one for each of the country's 26  
 124 provinces, while the central normative level is headquartered in Kinshasa, the capital city.

125  
 126 Walungu is characterized as a rural HZ with an estimated population of 285 669 in 2019,  
 127 distributed across 23 HAs (Table 1). According to the 2020 report from the HZ Central Office,  
 128 the estimated coverage rate is 96%. This is defined as the population living within less than 5  
 129 km from an integrated health facility without significant geographical barriers (19). Similar to  
 130 most HZs in eastern DRC, Walungu is a post-conflict zone that continues to experience sporadic  
 131 attacks on its population by armed rebel groups (1,21).

132

133 **Table 1. General characteristics of the Walungu HZ**

|                                       | Baseline | RIPSEC Program Years |        |        |        |        |
|---------------------------------------|----------|----------------------|--------|--------|--------|--------|
|                                       | 2014     | 2015                 | 2016   | 2017   | 2018   | 2019   |
| <b>Variables</b>                      |          |                      |        |        |        |        |
| <b>Population (inhabitants)</b>       | 244684   | 252269               | 260362 | 268434 | 276755 | 285669 |
| <b>Number HAs</b>                     | 23       | 23                   | 23     | 23     | 23     | 23     |
| <b>Number of GRH</b>                  | 1        | 1                    | 1      | 1      | 1      | 1      |
| <b>Number Referral Health Centers</b> | 5        | 5                    | 5      | 5      | 5      | 5      |
| <b>Number of Health Centers</b>       | 23       | 23                   | 23     | 23     | 23     | 23     |
| <b>Number of Health Posts</b>         | 3        | 4                    | 6      | 6      | 6      | 7      |
| <b>Number of beds in the GRH</b>      | 200      | 200                  | 235    | 233    | 286    | 272    |
| <b>Health Coverage</b>                | 96.4%    | 96.4%                | 96.4%  | 96.4%  | 96.4%  | 96.4%  |
| <b>Number of medical doctors</b>      | 9        | 9                    | 9      | 9      | 9      | 10     |
| <b>Number of nurses</b>               | 121      | 127                  | 137    | 164    | 153    | 201    |
| <b>Medical doctors /10000 inhab.</b>  | 0.37     | 0.36                 | 0.35   | 0.34   | 0.33   | 0.35   |

|                              |     |     |     |     |      |     |
|------------------------------|-----|-----|-----|-----|------|-----|
| <b>Nurses / 10000 inhab.</b> | 4.9 | 5.0 | 5.3 | 6.1 | 5.5  | 7.0 |
| <b>Beds / 10000 inhab.</b>   | 8.2 | 7.9 | 9.0 | 8.7 | 10.3 | 9.5 |

134

## 135 **Intervention framework of the RIPSEC program in Walungu**

136 The RIPSEC program, led by a consortium of three Schools of Public Health in the DRC and  
137 funded by the European Union, was operational from 2015 to 2019. Its overarching goal was  
138 to enhance the use of scientific evidence in health policy development to improve health  
139 outcomes. It implemented three LRZs across three provinces, the program led by three main  
140 DRC's academic public health institutions: UNILU in Haut-Katanga province (for Kisanga  
141 HZ), UNIKIN in Kongo Central province (for Gombe Matadi HZ), and "Ecole Régionale de  
142 Santé Publique" of the "Université Catholique de Bukavu" (ERSP-UCB) in South-Kivu  
143 province (for Walungu HZ) (22).

144

145 In Walungu, the RIPSEC program included four major "transformation projects" designed to  
146 boost the effectiveness of the HZMT. These components were: (i) leadership strengthening, (ii)  
147 formative supervision, (iii) enhancement of referral and counter-referral systems, and (iv)  
148 transformation of health facilities into model structures for other HZs.

149

150 Leadership development was customized to fit the specific needs of Walungu, focusing on  
151 enhancing functionality and ensuring efficient coordination of activities.

152 The mentorship was led by a well-defined profile: a public health expert and experienced  
153 former HZ manager who was working, at the time of his selection, as manager of a health  
154 program at provincial level. This mentor was responsible for organizing weekly HZMT  
155 meetings, providing individual coaching to foster greater commitment and participation in  
156 management activities. Formative supervision replaced previous supervisory approaches with

157 interactive, on-the-spot error correction and detailed reporting post-visit. The standardization  
158 of referral and counter-referral tools was aimed at harmonizing procedures and improving  
159 communication across facilities. Additionally, facilitating exchanges between lower and  
160 higher-performing facilities aimed to enhance performance indicators and disseminate best  
161 practices. All activities were meticulously documented under the oversight of ERSP-UCB (23).  
162

## 163 **Conceptual framework**

164 The framework (Fig 1) conceptualizes the transformative potential of targeted leadership  
165 support within a complex socio-economic, cultural, and administrative context marked by  
166 post-conflict recovery. It delineates the process by which leadership enhancement of the  
167 HZMT through RIPSEC's mentorship is expected to directly improve the overall functionality  
168 and performance of the HZ. Activities are strategically designed to address the unique  
169 challenges encountered in Walungu effectively. Expected outcomes include an increased  
170 utilization of curative services and a notable reduction in the negative impacts of IHFs, among  
171 other potential improvements.

172

173 *Fig 1. Conceptual framework of the RIPSEC program intervention in Walungu LRZ*

174

## 175 **Definition of concepts**

176 (1) Mentorship: In the context of public health, mentorship refers to a supportive and advisory  
177 relationship where an experienced individual (the mentor) guides and assists a less  
178 experienced individual (the mentee) in their professional development. The goal is to enhance  
179 the mentee's skills, knowledge, and confidence (22). Within the RIPSEC program, a public  
180 health expert from the ERSP-UCB was assigned to provide ongoing technical support,



181 training, advice, and local coaching to improve leadership and management skills of the HZ  
182 managers (22,23).

183 (2) Learning and Research Zone (LRZ): An LRZ is a designated environment that facilitates  
184 learning, research, and the development of improved practices through collaboration between  
185 researchers and health managers (13,24). In the RIPSEC context, the Walungu LRZ served as  
186 a testbed for innovative strategies and interventions aimed at enhancing the healthcare system  
187 and generating evidence. The mentorship activities described in this study are integral  
188 components of this LRZ's function (22).

189 (3) Health structures: Walungu HZ encompasses a range of health facilities (HF) offering  
190 diverse healthcare needs. These include:

- 191 • Health Centers: First-line HF that deliver a minimum package of services, including  
192 curative, preventive, promotional, and rehabilitation activities.
- 193 • Walungu General Referral Hospital: A second-line medical facility that offers a  
194 complementary package of activities, including the four essential services of Internal  
195 Medicine, Surgery, Gynaeco-obstetrics, and Pediatrics.

196 Additionally, the zone features various other health structures that provide a spectrum of care  
197 levels. At one end are Health Posts, offering the most basic care package, and at the other,  
198 Reference Health Centers equipped with maternity units and comprehensive medical  
199 consultation services, going beyond the minimum care package (19).

200 Among these structures, some are integrated. Integrated structures are state-approved facilities  
201 adhering to national health standards and reporting to the Ministry of Health. Conversely,  
202 private facilities, though state-approved, are not mandated to report their data to the Ministry  
203 of Health(18,25).

204 (4) Informal Healthcare Facilities (IHF) : These are entities that purport to offer care aimed  
205 at curing or alleviating illnesses without the requisite quality or authorization. They fall into  
206 two categories:

- 207 • Traditional Medicine facilities: Structures claiming to treat illnesses using traditional  
208 methods and materials such as plants, leaves, roots, and animal parts not recognized in  
209 modern pharmacology.
- 210 • Prayer-based facilities: Facilities that organize prayer sessions or vigils seeking divine  
211 healing.

212

## 213 **Type and period of study**

214 This study is an analysis of the implementation of the RIPSEC program in the Walungu LRZ,  
215 employing a single case study approach. We employed a mixed-methods approach for  
216 exploratory purposes (Table 2), combining retrospective analysis of key health indicators from  
217 2014 (pre-implementation) through the five-year duration of the RIPSEC project (2015-2019),  
218 with in-depth qualitative interviews conducted post-program. Data triangulation from these  
219 approaches was used to enhance the robustness of our findings.(27-29). Quantitative data were  
220 collected continuously from January 1<sup>st</sup>, 2015, to December 23<sup>rd</sup>, 2019, and were accessed for  
221 analysis on March 23<sup>rd</sup>, 2022. The qualitative component, focusing on the program's  
222 contribution to leadership and governance development, involved interviews with key HZMT  
223 members. These interviews were conducted from November 23<sup>rd</sup> to December 15<sup>th</sup>, 2022, to  
224 assess the enduring impacts and gather reflective insights from the stakeholders involved.

225

226 **Table 2. Summary of study approaches**

| Approach | Resources | Information sought |
|----------|-----------|--------------------|
|----------|-----------|--------------------|

|                     |                                                                                     |                                                                                                                      |
|---------------------|-------------------------------------------------------------------------------------|----------------------------------------------------------------------------------------------------------------------|
| <b>Quantitative</b> | Analysis of health indicators from 2014 to 2019.                                    | Objective evaluation of functionality and performance trends, and the impact of IHFs on service utilization.         |
| <b>Qualitative</b>  | Individual interviews with members of the Walungu HZMT who served during 2015-2019. | Retrospective insights on the impact of mentorship on leadership development and problem management within the zone. |

227

## 228 **Sampling and data collection**

229

### 230 **1) Quantitative component of the study**

231 To assess the evolution of the zone's functionality and performance, exhaustive sampling was  
232 employed, focusing on key health indicators at the HZ, particularly those related to service  
233 utilization in integrated facilities. During the RIPSEC program period, deidentified data were  
234 gathered from secondary sources, specifically health reports at both the HF and HZ Central  
235 Office levels, by the program mentor. This data collection process ensured that there was no  
236 access to individual identities during and after data collection. The mentor, serving as a part-  
237 time technical assistant, played a pivotal role in organizing the HZ, collecting data monthly,  
238 and coaching the HZMT. The mentor's presence during the RIPSEC program ensured the  
239 reliability of the data recorded in monthly reports. For observations prior to the LRZ  
240 establishment, the scope of the data collection was restricted to the year 2014. This limitation  
241 was due to the incomplete implementation of the national DHIS2 data system at that time (29)  
242 and the absence of the RIPSEC mentor in the zone. Additionally, archival weaknesses during  
243 this period further restricted the reliability of any data prior to 2014. Collected data were stored  
244 on a secured disk at the ERSP-UCB.

245  
 246 Performance indicators were specifically selected to reflect preventive activities at first-line  
 247 HFs and curative activities at second-line HFs. This study emphasized the rate of use of  
 248 curative services in Walungu’s HFs as a proxy for assessing the population's reliance on  
 249 IHFs: a lower usage rate suggests a higher likelihood of the population turning to alternative  
 250 curative options. These indicators, presented as rates, were chosen to mirror the impact of  
 251 managerial leadership in health service delivery (4,14) (Table 3).

252

253 **Table 3. Performance indicator**

| <b>Indicator</b>                                   | <b>Definition</b>                                                                                                                                                        | <b>Link with Leadership</b>                                                                                     |
|----------------------------------------------------|--------------------------------------------------------------------------------------------------------------------------------------------------------------------------|-----------------------------------------------------------------------------------------------------------------|
| <b>First Line of Care (Health Centre)</b>          |                                                                                                                                                                          |                                                                                                                 |
| <b>First Antenatal Visit Utilization rate</b>      | Quotient of the number of pregnant women who attended their first antenatal visit over the total number of eligible pregnant women in the HZ, multiplied by 100.         | Reflects the effectiveness of HZ managers in promoting initial prenatal consultations among pregnant women.     |
| <b>Fourth Antenatal Visit Utilization Rate</b>     | Quotient of the number of pregnant women who attended all previous antenatal appointments over the total number of eligible pregnant women in the HZ, multiplied by 100. | Demonstrates the ability of managers to ensure continued engagement of pregnant women in ongoing prenatal care. |
| <b>Third Dose Pentavalent Vaccine Wastage Rate</b> | Difference between the number of children who received the first and third doses of the pentavalent vaccine,                                                             | Indicates managerial effectiveness in maintaining adherence to the national child vaccination schedule.         |

|                                                             |                                                                                                                                                      |                                                                                                                                                                      |
|-------------------------------------------------------------|------------------------------------------------------------------------------------------------------------------------------------------------------|----------------------------------------------------------------------------------------------------------------------------------------------------------------------|
|                                                             | divided by the number who received the first dose, multiplied by 100.                                                                                |                                                                                                                                                                      |
| <b>Measles Vaccination Rate</b>                             | Quotient of the number of 9-month-old children vaccinated against measles over the total number of eligible 9-month-old children, multiplied by 100. | Shows the success of managers in sustaining long-term vaccination adherence among caregivers throughout the national child vaccine schedule (from 0 to 9 months old) |
| <b>Second Line of Care (General Referral Hospital)</b>      |                                                                                                                                                      |                                                                                                                                                                      |
| <b>Curative Services Utilization Rate</b>                   | Quotient of the total number of new cases treated over the population-years, multiplied by 100.                                                      | Relates to managers' success in ensuring service availability and accessibility and promoting the utilization of integrated health services.                         |
| <b>Rate of Births Attended by Qualified Health Provider</b> | Number of births attended by skilled personnel divided by the total number of births, multiplied by 100.                                             | Indicates effectiveness in encouraging professional birth attendance through proactive management and patient education.                                             |
| <b>Rate of Reference of patients from HCs to the HGR</b>    | Quotient of the number of patients referred from HCs to the HGR over the total number of Health Centre visitors, multiplied by 100.                  | Reflects managerial efficiency in adhering to care standards and ensuring appropriate care referrals.                                                                |

|                                          |                                                                                                        |                                                                                                                                              |
|------------------------------------------|--------------------------------------------------------------------------------------------------------|----------------------------------------------------------------------------------------------------------------------------------------------|
| <p><b>In-hospital Mortality Rate</b></p> | <p>Quotient of the number of in-hospital deaths over total hospital admissions, multiplied by 100.</p> | <p>Measures the impact of managerial actions on care quality, including protocol implementation, staff training, and outcome monitoring.</p> |
|------------------------------------------|--------------------------------------------------------------------------------------------------------|----------------------------------------------------------------------------------------------------------------------------------------------|

254

255 For functionality, indicators aligned with leadership and good governance were chosen. These  
 256 include organizational and managerial capacities typically found in a HZ manager  
 257 demonstrating effective leadership. Such indicators include the frequency of various  
 258 meetings, such as the Board of Directors meeting (encompassing HZMT, provincial-level  
 259 managers, and technical partners from the zone), Management Board meeting (HZ Central  
 260 Office and GRH managers), HZ Central Office Board of Directors meeting, GRH Board of  
 261 Directors meeting, HZ Reviews, and Health Development Committee of the HZ meetings  
 262 (14).

263

264 To understand the dynamics of the population using IHFs, including traditional medicine and  
 265 prayer groups, we employed an indirect indicator—the number of IHF providers identified in  
 266 the HAs. We posited that the proliferation of IHFs incentivizes their use (12); thus, the higher  
 267 the number of IHFs in a HA, the greater the impact on curative services rates.

268 We categorized Walungu’s HAs into two groups based on the average number of IHFs: “safe  
 269 HAs” were those HAs counting less than the average number of IHFs per HA in Walungu, and  
 270 “infiltrated HAs” were those counting at least the average number of IHFs within them. Thus,  
 271 of the 23 HAs in the zone, 10 have been categorized as “safe HAs” and 13 as “infiltrated HAs”.

272 This data has been available since 2014 and was assumed to be stable through 2019.

273

## 274 **2) Qualitative component**

275 In-depth interviews were conducted with Walungu HZMT members who had served for at  
276 least two consecutive years during or overlapping with the RIPSEC program period. Members  
277 eligible for the study were identified from the RIPSEC archives and subsequently contacted.  
278 Seven members, all male, agreed to participate. The interviews were carried out either face-  
279 to-face or remotely, depending on the participants' availability, and verbal informed consent  
280 was obtained prior to each session. Each interview lasted about 43 minutes. The interview  
281 guide was developed based on the preliminary analysis of quantitative data, and the  
282 interviews were conducted by two senior researchers with extensive experience in qualitative  
283 methods. All interview audios and transcripts were securely stored on a disk at the ERSP-  
284 UCB.

285

### 286 **Note:**

287 While the contribution of various technical and financial partners is acknowledged as vital in  
288 strengthening the DRC's health system, often described as essential to the basic functioning  
289 of the majority of the region's HZs (30), this study deliberately narrows its focus to the  
290 specific impact of the RIPSEC program. This focused approach is justified by the unique  
291 nature of the RIPSEC intervention, which integrates mentorship and leadership development,  
292 components not typically emphasized to the same extent in other partnerships. By isolating  
293 the effects of RIPSEC, we aim to assess the distinct influence of its mentorship and training  
294 components on the functionality and performance of Walungu. Moreover, treating the  
295 interventions of other partners as elements of the overall context allows for a more controlled  
296 study of RIPSEC's direct contributions, providing valuable insights into the effectiveness of  
297 targeted mentorship and leadership training in health system strengthening. This

298 methodological choice enhances the study's specificity and relevance, for a more precise  
299 understanding of how focused leadership initiatives can impact health outcomes in crisis-  
300 affected areas.

301

## 302 **Analysis**

303 The data collected in HFs were organized on MS-Excel spreadsheets, and analyzed using MS-  
304 Excel for some, and STATA Version 17 for others. Simple linear regression was used to  
305 assess the influence of IHF presence on curative service utilization in 2014 and during the  
306 LRZ years (2015-2019), with significance set at  $p < 0.05$ .

307

308 Functionality and performance were evaluated using an internal benchmarking method  
309 (31,32), starting with indicator selection, and scoring (ranging from 0 to 4, where 4 indicates  
310 the target achieved). Scores were adjusted based on expected results and predefined standards,  
311 allowing for comparative analysis. Walungu's performance in the 13 selected indicators was  
312 benchmarked comparatively to standards used by the DRC's health system to assess HZs  
313 achievements (4,31,33). Results were illustrated through curves showing changes from 2014  
314 to 2019.

315

316 For the qualitative data, a deductive thematic analysis was applied to the interview transcripts,  
317 which were anonymized and coded from RP1 to RP7. The analysis framework was based on  
318 the interview guide, enriched by the initial quantitative findings. Themes included (i) the  
319 mentorship's contribution to leadership, (ii) its effect on HZ functionality and performance, and  
320 particularly, (iii) its effect on curative service usage confronted to IHFs. Manual coding  
321 identified relevant categories, and thematic grouping facilitated theory development and sub-  
322 theme identification.



323

## 324 **Ethical considerations**

325 The research protocol for this study was approved by the ethics committee of the Université  
326 Catholique de Bukavu under the reference number UCB/CIES/NC/019/2021. The approval  
327 was granted under the title “Support for Strengthening the Management and Leadership Skills  
328 of the National Malaria Control Program Management Team”. All stages of the study  
329 complied with the relevant guidelines and regulations. All participants provided informed  
330 consent before taking part in the study.

331

## 332 **Results**

333

### 334 **The use of curative services before and during RIPSEC program**

335 We observed an improvement in the use of curative care services in Walungu's safe HAs  
336 from the LRZ years onwards (Fig 2), while there was a deterioration in infiltrated HAs over  
337 the same period. Safe HAs consistently showed better rates of curative service utilization. In  
338 2018, there was a sharp decline in the rates for both types of HAs, which subsequently  
339 recovered in 2019. It is important to note that the utilization rates for curative services  
340 remained below 50% across all HAs at all times.

341

342 *Fig 2. Curative healthcare services utilization rate trends (the dotted line delimits the*  
343 *periods before and during RIPSEC)*

344

### 345 **Influence of IHFs on the use of curative services**

346 Table 4 presents the results from a simple linear regression that assesses the influence of IHFs  
 347 on the rate of use of curative services in Walungu’s HAs. The  $\beta$  value for safe HAs before  
 348 RIPSEC indicated a trend towards higher use of curative services compared to infiltrated  
 349 HAs, although this difference was not statistically significant ( $p=0.062$ ). During the  
 350 mentorship years, safe HAs had a statistically significant higher average rate of use of  
 351 curative services ( $\beta=0.10$ ,  $p=0.007$ ) compared to infiltrated HAs. These findings suggest that  
 352 the presence of IHFs negatively influences the utilization of curative services.

353

354 **Table 4. Use of curative services and IHFs before and during RIPSEC program**

| Variables              | Before RIPSEC (2014) |         | During RIPSEC (2015-2019) |         |
|------------------------|----------------------|---------|---------------------------|---------|
|                        | $\beta$ (95% CI)     | p-value | $\beta$ (95% CI)          | p-value |
| <b>Types of HAs</b>    |                      |         |                           |         |
| <b>Safe HAs</b>        | 0.07 (-.001 ; 0.13)  | 0,062   | 0.10 (0.03 ; 0.17)        | 0.007   |
| <b>Infiltrated HAs</b> | 0                    |         | 0                         |         |

355

### 356 **Walungu’s achievements before and during RIPSEC program**

357 An analysis of trends in the selected indicators is summarized in the figures above. Generally,  
 358 both curative and preventive activities exhibit positive trends, with preventive activities  
 359 consistently recording better performance scores than curative ones (Fig 3). Regarding the  
 360 management indicators, there is an overall upward trend; however, a distinct decline occurred  
 361 in 2018, followed by a recovery. The analysis of the evolution of functionality and  
 362 performance (Fig 4) indicates an overall improvement during the RIPSEC years compared to  
 363 2014. Notably, performance consistently exceeds functionality across the years, with the same  
 364 sharp decline in 2018 as previously observed.

365

366 ***Fig 3. Preventive, curative and managerial activities trends in Walungu (the dotted line***  
367 ***delimits the periods before and during RIPSEC)***

368

369 ***Fig 4. Functionality and performance trends in Walungu (the dotted line delimits the***  
370 ***periods before and during RIPSEC).***

371

## 372 **HZMT members' experience of RIPSEC mentorship**

373

374 Our thematic analysis of the interview transcripts deduced three primary themes, with a fourth  
375 unexpected theme emerging: the challenges encountered in sustaining the achievements of the  
376 RIPSEC program.

377

### 378 **Leadership under RIPSEC mentorship**

379 The interviews highlighted a strengthening of leadership within the HZ management during  
380 the program, emphasizing the significance of a clear vision and effective decision-making.

381 Participants frequently credited the RIPSEC program as a catalyst for this transformation by  
382 introducing crucial leadership training and strategies to address identified gaps. Despite  
383 financial constraints and limited resources, the training and capacity-building initiatives  
384 positively impacted care quality and patient management. Respondents noted improvements  
385 in accountability, transparency, and coordination across different health management levels.

386 *"Leadership has really changed the way we run services... now there is more*  
387 *accountability and follow-through" (RP1).*

388

389 *"Leadership is crucial. Before RIPSEC leadership training, our efforts were scattered."*  
390 *(RP5)*

391

392 *"We needed leaders who understood our challenges and could guide effectively." (RP3)*

393

### 394 **Improving health outcomes in the area**

395 Respondents recognized staff training and skills development as positive aspects of the  
396 RIPSEC program. These initiatives have helped stabilize health indicators in accordance with  
397 standards. Specifically, nurse managers at HCs were trained to enhance quality of care within  
398 their facilities, which improved clinical skills and positively affected health indicators, case  
399 management, and team communication through frequent capacity sharing sessions.

400 *"The training courses have greatly helped our staff to manage cases more effectively"*  
401 *(RP5).*

402

403 *"Communication mechanisms have been put in place to enable nurses and referred*  
404 *patients to make contact with the doctors who will see patients in hospital." (RP3)*

405

406 *"I can personally say that through the activities that have been carried out with the*  
407 *community, my skills and knowledge have increased as a result of sharing experiences*  
408 *with others. Although I wasn't directly involved, but with the exchanges of experience*  
409 *that we did, it was beneficial for everyone, for the community." (RP7)*

410

### 411 **Use of curative services in competition from IHFs**

412 Participants discussed how informal care structures, such as prayer houses and traditional  
413 healers, significantly attract the population, impacting the use of formal health services,  
414 especially in geographically hard to reach HAs. Cultural beliefs and socio-economic  
415 challenges as well as poor governance practices have hindered integration of these facilities

416 into a regulated framework. The RIPSEC mentorship attempted to address these issues by  
417 developing several initiatives to curb this unregulated competition, leading to improved  
418 coordination of care and increased health awareness.

419 *"When you arrive in almost all the zones at the moment, it's the people from X territory*  
420 *who have unlicensed structures because they currently have a brother from the same*  
421 *territory who is a minister. Now he's encouraged them to open pirate facilities and you, as*  
422 *the zone's chief medical officer, have no power over them. "(RP1)*

423  
424 *"Within the RIPSEC project, we sought to involve local authorities with the aim of raising*  
425 *awareness of the need to monitor informal care homes." (RP4)*

426 *"With the presence of these prayer rooms, many health facilities are not able to attract as*  
427 *many patients as they should... We have identified and drawn up a list of these*  
428 *problematic facilities in collaboration with community leaders." (RP6)*

429  
430 *"RIPSEC had trained and informed the community health workers on how to manage and*  
431 *listen carefully to the community's problems... I saw the community health workers*  
432 *trained by RIPSEC go out into the community to raise awareness or inform people about*  
433 *their rights but also their advantage of attending the integrated health center." (RP7)*

434

### 435 **Sustaining RIPSEC's achievements**

436 Challenges related to disruptive events were noted. Respondents mentioned, among other  
437 things, obstacles such as internal conflicts and the instability of human resources (particularly  
438 the 2018 Ebola Virus epidemic, the death of the GRH medical director and the departure of  
439 the zone's chief medical officer, in 2018), which significantly slowed down the project's

440 progress. Concerns were raised about resources gaps and the long-term sustainability of  
441 improvements.

442 *"Since RIPSEC, we have seen better use of services, but there are still challenges to be*  
443 *overcome" (RP3)*

444

445 *"The lack of funding and equipment is a major challenge for us." (RP2)*

446

447 *"In 2018, first there were staff disruptions at hospital level. And then there was the Ebola*  
448 *epidemic, there were the unfortunate events that followed: there were doctors who died in*  
449 *the hospital in the space of two years, and who had benefited from RIPSEC training."*  
450 *(RP5)*

451

452 The limited duration of the program (5 years) was frequently cited as a barrier to achieving  
453 lasting success and hindered the transmission of LRZ achievements and good practices to  
454 other provincial HZs.

455 *Providers with experience in managing deliveries at the General Referral Hospital*  
456 *were going to work in the two health centers in order to raise the level (of competence*  
457 *of the providers) in the health centers... RIPSEC stopped when all 4 projects were not*  
458 *yet well covered. If I had the power, I would relaunch RIPSEC. And as I said, we were*  
459 *a pilot health zone, we were supposed to set an example for the other zones, but*  
460 *unfortunately the project came to an end and the other zones stopped coming... (RP1)*

461

## 462 **Discussion**

463

## 464 **Overview**

465 The aim of this study was to explore the impact of a mentorship-based leadership  
466 development program on the functionality and performance of a HZ, and on its capacity to  
467 resolve specific problems, in a crisis context. We focused on the Walungu HZ, faced with the  
468 specific problem of the presence of IHFs. We investigated how the transformation of the  
469 Walungu into a LRZ under the RIPSEC program's mentorship influenced health outcomes  
470 within the HZ. Findings reveal that while the program led to a modest but significant  
471 improvement in health service utilization and management capabilities, the persistent  
472 influence of IHFs, exacerbated by socio-economic and governance factors, continue to pose  
473 significant challenges. Despite the progress made through mentorship, sustainability strategies  
474 and continuous support are required to maintain and effectively integrate these initiatives into  
475 existing healthcare systems.

476

### 477 **The challenge of IHFs**

478 The rate of service utilization in Walungu remains low, falling below the standard threshold  
479 of 50% (19), in stark contrast to the provincial average which increased from 34% to 53%  
480 during the same period (5).

481 Trend curves for the use of curative health services indicate a decline in formal service usage  
482 in areas with a high concentration of IHFs, suggesting that regulatory efforts in these areas are  
483 less effective. Respondents indicated that influence peddling often places these informal  
484 entities beyond legal oversight, undermining the regulatory authority of HZ managers. The  
485 limited decision space available to these managers, constrained by political interference, not  
486 only diminishes their leadership prerogatives but also hinders the implementation of strategies  
487 aimed at enhancing quality service delivery. Research in similar settings has highlighted the  
488 detrimental and pervasive impact of such practices (11,34). Additionally, poverty and lack of  
489 knowledge are prominent factors driving the community's preference for IHFs. Literature

490 suggests that while lower direct costs attract patients to IHFs (8), dissatisfaction with the  
491 formal healthcare system, especially for chronic conditions that require substantial  
492 psychosocial support and person-centered care, is also a significant factor (12,35–38).  
493 Improving healthcare managers' capabilities is a key not only for enhancing access to care but  
494 also for ensuring the quality of care is centered around individual needs, thereby optimizing  
495 outcomes despite these external pressures.

496

### 497 **LRZ performance and functionality**

498 During the mentorship years, a noticeable improvement was observed in both performance  
499 and functionality, compared to the baseline year of 2014. According to respondents, these  
500 enhancements were primarily driven by the improvement in leadership and strategic planning  
501 fostered through the mentorship. This aligns with findings from several other studies that  
502 highlight the positive impact of leadership enhancement on health system performance (14–  
503 16,20). Analysis of the data shows fluctuating trends, reflecting the influence of various  
504 stability-threatening events both internal and external to the HZ, as detailed by our  
505 respondents. Additionally, these fluctuations might also represent other destabilizing factors  
506 not accounted for in this study, such as sporadic security crises and disruptions in external  
507 funding, both of which heavily influence the system. These factors have been noted by other  
508 researchers as significantly affecting health outcomes in HZs (4,5,39–41). It is consistently  
509 observed that performance surpasses functionality, likely because healthcare activities tend to  
510 receive more support from external partners compared to managerial functions (42,43).

511

### 512 **Leadership development: The Learning Site model?**

513 According to our respondents, the RIPSEC mentorship significantly strengthened the  
514 leadership skills of HZ managers, enhancing resource management, decision-making, and



515 strategic planning. This progress aligns with mechanisms identified in other sub-Saharan  
516 contexts, where increased self-efficacy and perceived autonomy among managers lead to  
517 positive outcomes within supportive and conducive working environments (44,45). These  
518 findings are consistent with the realist evaluation approach, which posits that the effectiveness  
519 of support depends on specific contextual factors, actors, and mechanisms, encapsulated in  
520 the 'Intervention-Context-Actor-Mechanism-Outcome' (ICAMO) configuration (46,47). By  
521 fostering psychological safety and trust, RIPSEC mentorship has effectively facilitated  
522 knowledge transfer, merging theoretical insights with practical field challenges, and tailored  
523 strategies to meet the unique needs of Walungu. The importance of real-time, on-site learning  
524 for governance, as highlighted in studies from Kenya and South Africa, complements our  
525 observations of enhanced decision-making and strategic planning in Walungu (48). Similarly,  
526 the learning sites model, which supported micro-practices of governance, has provided a  
527 dynamic setting in which health managers engage in informed decision-making. This method  
528 enhances understanding and supports emergent system changes, demonstrating the value of  
529 site-based, engaged research programs, as further evidenced by a systematic review of district  
530 health system management (49).

531

## 532 **Sustaining achievements**

533 Our study revealed challenges in maintaining the improvements achieved after the RIPSEC  
534 program ended. Immediately after the implementation of the RIPSEC mentorship, initial  
535 improvements in service use were observed. However, in 2018, the trend curves indicated a  
536 significant disruption in progress due to events such as the loss of skilled human resources  
537 and an epidemic emergency, as reported by our respondents. Similar constraints have been  
538 noted in other low-income contexts, where the success of interventions like RIPSEC not only  
539 relies on initial outcomes but also on the health system's resilience to acute emergencies and

540 the sustainability of funding and managerial practices (4,22,49,50). These findings suggest  
541 that while programs like RIPSEC can positively impact health outcomes, they are insufficient  
542 on their own to overcome all challenges. The lack of sustainable funding strategies, reliance  
543 on external aid, and instability of the health workforce could undermine the progress made in  
544 LRZ-type strengthening strategies. Experiences from other Sub-Saharan African LRZs  
545 indicate that long-term success and scalability depend on continuous engagement, adaptation  
546 of best practices, and integration of research into everyday managerial activities (22) The  
547 qualitative assessment of LRZs underscores the need to promote reflexivity in managerial  
548 decisions and to focus research on immediate LRZ challenges to foster transformative  
549 mentorship. Future studies should explore approaches that integrate these initiatives into  
550 existing healthcare systems and ensure ongoing support.

551

## 552 **Limits of the study**

553 Although this study has provided valuable insights into the impact of the RIPSEC program on  
554 leadership strengthening and health service improvement in the Walungu HZ, it is not without  
555 limitations. Firstly, the retrospective design of the quantitative analysis constrains our  
556 capacity to definitively ascertain causal relationships between the RIPSEC interventions and  
557 the observed enhancements in health indicators. Secondly, the qualitative component, while  
558 providing depth through participant perspectives, may be influenced by retrospective bias or  
559 social desirability, affecting the objectivity of the responses (52). Thirdly, focusing  
560 exclusively on a single HZ limits the extent to which the findings can be generalized to other  
561 settings. Despite these considerations, the study significantly advances our understanding of  
562 the impact of health leadership development programs in contexts of crisis.

563

## 564 **Conclusion**

565

566 This study demonstrates that the RIPSEC program positively influenced leadership  
567 enhancement and health service improvement in the Walungu HZ. Despite these gains,  
568 persistent financial challenges and the prevalent informal healthcare facilities (IHF) pose  
569 obstacles that the program alone cannot surmount. Mentorship under RIPSEC led to better  
570 resource management, decision-making, and strategic planning, contributing to a modest  
571 increase in the utilization of formal health services. Yet, the reliance on external support and  
572 workforce instability have compromised the long-term sustainability of these improvements.  
573 This underscores the necessity for durable strategies to embed such initiatives within the  
574 existing health system framework. While the study reaffirms the critical role of leadership in  
575 public health, particularly in crisis-affected settings, it also highlights that mentorship alone is  
576 insufficient to fully address the managerial challenges HZs face. Support from external aid  
577 remains essential in crisis areas to progress towards universal health coverage.

578

## 579 **Aknowledgments**

580

581 We extend our thanks to all those who contributed to the successful completion of this study.  
582 We are particularly grateful to the staff and management of the Walungu Health Zone for  
583 their cooperation and assistance throughout the research process. Special thanks to the  
584 RIPSEC program for their invaluable mentorship which were pivotal in conducting this  
585 research. Our gratitude also goes to staff of researchers of the ERSP-UCB for their support for  
586 this study.

587

## 588 **References**

589

590 1. Bendavid E, Boerma T, Akseer N, Langer A, Malembaka EB, Okiro EA, et al. The  
591 effects of armed conflict on the health of women and children. *The Lancet*. 2021 Feb  
592 6;397(10273):522–32.

593 2. Bou-Karroum L, El-Harakeh A, Kassamany I, Ismail H, El Arnaout N, Charide R, et  
594 al. Health care workers in conflict and post-conflict settings: systematic mapping of the  
595 evidence. *PloS One*. 2020;15(5):e0233757.

596 3. Universal health coverage (UHC) [Internet]. [cited 2024 Jan 19]. Available from:  
597 [https://www.who.int/news-room/fact-sheets/detail/universal-health-coverage-\(uhc\)](https://www.who.int/news-room/fact-sheets/detail/universal-health-coverage-(uhc))

598 4. Makali SL, Karemere H, Banywesize R, Eboma CM, Mwene-Batu P, Lembebu C, et  
599 al. Adaptive Mechanisms of Health Zones to Chronic Traumatic Events in Eastern DRC: A  
600 Multiple Case Study. *Int J Health Policy Manag* [Internet]. 2023 Oct 4 [cited 2023 Nov 2];  
601 Available from: [https://www.ijhpm.com/article\\_4514.html](https://www.ijhpm.com/article_4514.html)

602 5. Altare C, Malembaka EB, Tosha M, Hook C, Ba H, Bikoro SM, et al. Health services  
603 for women, children and adolescents in conflict affected settings: experience from North and  
604 South Kivu, Democratic Republic of Congo. *Confl Health*. 2020 May 27;14(1):31.

605 6. Altare C, Castelgrande V, Tosha M, Malembaka EB, Spiegel P. From Insecurity to  
606 Health Service Delivery: Pathways and System Response Strategies in the Eastern  
607 Democratic Republic of the Congo. *Glob Health Sci Pract*. 2021 Dec 31;9(4):915–27.

608 7. Ministère de la Santé Publique de la République Démocratique du Congo. Rapport sur  
609 les comptes de la santé 2020 [Internet]. 2021. Available from:  
610 [https://sante.gouv.cd/content/uploads/RAPPORT\\_CNS\\_2020\\_86e645c64a.pdf](https://sante.gouv.cd/content/uploads/RAPPORT_CNS_2020_86e645c64a.pdf)

611 8. Laokri S, Soelaeman R, Hotchkiss DR. Assessing out-of-pocket expenditures for  
612 primary health care: How responsive is the Democratic Republic of Congo health system to  
613 providing financial risk protection? *BMC Health Serv Res*. 2018;18(1):1–20.

- 614 9. Alam K, Mahal A. Economic impacts of health shocks on households in low and  
615 middle income countries: a review of the literature. *Glob Health*. 2014 Apr 3;10(1):21.
- 616 10. Stearns J, Vogel C. The Landscape of Armed Groups in the Eastern Congo. Stearns  
617 Jason Vogel Christoph 2015 Landsc Armed Groups East Congo N Y Congo Res Group N Y  
618 Univ CIC [Internet]. 2015 Dec [cited 2022 Apr 7]; Available from:  
619 <http://congoresearchgroup.org/essay-the-landscape-of-armed-groups-in-eastern-congo-2/>
- 620 11. Bigirinama RN, Makali SL, Mothupi MC, Chiribagula CZ, St Louis P, Mwene-Batu  
621 PL, et al. Ensuring leadership at the operational level of a health system in protracted crisis  
622 context: a cross-sectional qualitative study covering 8 health districts in Eastern Democratic  
623 Republic of Congo. *BMC Health Serv Res*. 2023 Dec 6;23(1):1362.
- 624 12. Bapolisi WA, Karemere H, Ndogozi F, Cikomola A, Kasongo G, Ntambwe A, et al.  
625 First recourse for care-seeking and associated factors among rural populations in the eastern  
626 Democratic Republic of the Congo. *BMC Public Health*. 2021 Jul 10;21(1):1367.
- 627 13. Kagwanja N, Waithaka D, Nzinga J, Tsofa B, Boga M, Leli H, et al. Shocks, stress  
628 and everyday health system resilience: experiences from the Kenyan coast. *Health Policy  
629 Plan*. 2020;35(5):522–35.
- 630 14. Mutale W, Vardoy-Mutale AT, Kachemba A, Mukendi R, Clarke K, Mulenga D.  
631 Leadership and management training as a catalyst to health system strengthening in low-  
632 income settings: Evidence from implementation of the Zambia Management and Leadership  
633 course for district health managers in Zambia. *PLOS ONE*. 2017 Jul 25;12(7):e0174536.
- 634 15. Chelagat T, Rice J, Onyango J, Kokwaro G. An Assessment of Impact of Leadership  
635 Training on Health System Performance in Selected Counties in Kenya. *Front Public Health*.  
636 2013;8:550796.
- 637 16. Seims LRK, Alegre JC, Murei L, Bragar J, Thatte N, Kibunga P, et al. Strengthening  
638 management and leadership practices to increase health-service delivery in Kenya: an

- 639 evidence-based approach. *Hum Resour Health*. 2012 Aug 29;10(1):1–7.
- 640 17. World Health Organisation. Everybody’s business, Strengthening health system to  
641 improve health outcomes, WHO’s framework for action. 2007;
- 642 18. Ministère de la Santé Publique, Secrétariat Général, Kinshasa. Stratégie de  
643 Renforcement du Système de Santé [Internet]. Ministère de la Santé Publique de la  
644 République Démocratique du Congo; 2006 [cited 2023 Jan 13]. Available from:  
645 [http://planificationfamiliale-](http://planificationfamiliale-rdc.net/docs/2_StrategieDeRenforcementDuSystemeDeSante_SRSS_Juin2006.pdf)  
646 [rdc.net/docs/2\\_StrategieDeRenforcementDuSystemeDeSante\\_SRSS\\_Juin2006.pdf](http://planificationfamiliale-rdc.net/docs/2_StrategieDeRenforcementDuSystemeDeSante_SRSS_Juin2006.pdf)
- 647 19. Ministère de la Santé Publique de la République Démocratique du Congo. Recueil des  
648 normes d’organisation et de fonctionnement des structures sanitaires de la zone de santé en  
649 République Démocratique du Congo [Internet]. 2012. Available from:  
650 [https://docplayer.fr/34761187-Recueil-des-normes-d-organisation-et-de-fonctionnement-des-](https://docplayer.fr/34761187-Recueil-des-normes-d-organisation-et-de-fonctionnement-des-structures-sanitaires-de-la-zone-de-sante-en-republique-democratique-du-congo.html)  
651 [structures-sanitaires-de-la-zone-de-sante-en-republique-democratique-du-congo.html](https://docplayer.fr/34761187-Recueil-des-normes-d-organisation-et-de-fonctionnement-des-structures-sanitaires-de-la-zone-de-sante-en-republique-democratique-du-congo.html)
- 652 20. Johnson O, Begg K, Kelly AH, Sevdalis N. Interventions to strengthen the leadership  
653 capabilities of health professionals in Sub-Saharan Africa: a scoping review. *Health Policy*  
654 *Plan*. 2021;36:117–33.
- 655 21. Vlassenroot K. Households land use strategies in a protracted crisis context: land  
656 tenure, conflict and food security in eastern DRC. *Confl Res Group Univ Ghent*. 2005;
- 657 22. Michaux G, Mwembo-Tambwe A, Belrhiti Z, Monet F, Criel B. Développement des  
658 Zones de Santé d’Apprentissage et de Recherche en République Démocratique du Congo :  
659 enseignements utiles d’une évaluation qualitative des expériences antérieures en Afrique  
660 Subsaharienne. *Glob Health Promot*. 2020 Jun 1;27(2):139–48.
- 661 23. RIPSEC RDCongo [Internet]. [cited 2022 May 11]. Programme RIPSEC. Available  
662 from: <https://ripsec.org/>
- 663 24. RESYST [Internet]. [cited 2024 Feb 2]. Health system learning sites: understanding

- 664 health systems through research collaboration and engagement. Available from:  
665 <https://resyst.lshtm.ac.uk/resources/health-system-learning-sites-understanding-health->  
666 [systems-through-research-collaboration](https://resyst.lshtm.ac.uk/resources/health-system-learning-sites-understanding-health-systems-through-research-collaboration)
- 667 25. Ministère de la Santé Publique de la République Démocratique du Congo. Plan  
668 National de Développement Sanitaire recadré pour la période 2019-2022 : Vers la couverture  
669 sanitaire universelle [Internet]. 2018. Available from:  
670 [https://www.globalfinancingfacility.org/sites/gff\\_new/files/documents/DRC\\_Investment\\_Cas](https://www.globalfinancingfacility.org/sites/gff_new/files/documents/DRC_Investment_Cas)  
671 [e\\_FR.pdf](https://www.globalfinancingfacility.org/sites/gff_new/files/documents/DRC_Investment_Cas_e_FR.pdf)
- 672 26. Palinkas LA, Mendon SJ, Hamilton AB. Innovations in Mixed Methods Evaluations.  
673 *Annu Rev Public Health*. 2019;40(1):423–42.
- 674 27. Yin RK. Case study research and applications [Internet]. Vol. 6. Sage Thousand Oaks,  
675 CA; 2018. Available from: [https://us.sagepub.com/en-us/nam/case-study-research-and-](https://us.sagepub.com/en-us/nam/case-study-research-and-applications/book250150)  
676 [applications/book250150](https://us.sagepub.com/en-us/nam/case-study-research-and-applications/book250150)
- 677 28. Champagne F, Contandriopoulos AP, Brousselle A, Hartz Z, Denis JL. L'évaluation  
678 dans le domaine de la santé : concepts et méthodes. In: Brousselle A, Champagne F,  
679 Contandriopoulos AP, Hartz Z, editors. L'évaluation : concepts et méthodes [Internet].  
680 Presses de l'Université de Montréal; 2011 [cited 2024 Apr 19]. p. 49–70. Available from:  
681 <http://books.openedition.org/pum/6300>
- 682 29. Siyangoli DSS. Implementation of DHIS2 in DRC: processes and challenges.  
683 Available from: [https://www.childhealthtaskforce.org/sites/default/files/2018-](https://www.childhealthtaskforce.org/sites/default/files/2018-09/data_wkshp_drc_dhis2_implem.pdf)  
684 [09/data\\_wkshp\\_drc\\_dhis2\\_implem.pdf](https://www.childhealthtaskforce.org/sites/default/files/2018-09/data_wkshp_drc_dhis2_implem.pdf)
- 685 30. Bisimwa G, Makali SL, Karemere H, Molima C, Nunga R, Iyeti A, et al. Contrat  
686 unique, une approche innovante de financement du niveau intermédiaire du système de santé  
687 en République Démocratique du Congo : processus et défis de mise en œuvre. *Afr J Prim*  
688 *Health Care Fam Med*. 2021 Dec 6;13(1):e1–9.

- 689 31. Benson HR. An introduction to benchmarking in healthcare. *Radiol Manage*. 1994 Jan  
690 1;16(4):35–9.
- 691 32. Walsh KE, Razzaghi H, Hartley DM, Utidjian L, Alford S, Darwar RA, et al. Testing  
692 the Use of Data Drawn from the Electronic Health Record to Compare Quality. *Pediatr Qual*  
693 *Saf*. 2021 Jul 1;6(4):e432.
- 694 33. Sicotte C, Champagne F, Contandriopoulos AP, Barnsley J, Beland F, Leggat SG, et  
695 al. A Conceptual Framework for the Analysis of Health Care Organizations' Performance.  
696 *Health Serv Manage Res*. 1998 Feb 1;11(1):24–41.
- 697 34. Bigirinama RN, Mothupi MC, Mwene-Batu PL, Kozuki N, Chiribagula CZ,  
698 Chimanuka CM, et al. Prioritization of maternal and newborn health policies and their  
699 implementation in the eastern conflict affected areas of the Democratic Republic of Congo: a  
700 political economy analysis. *Health Res Policy Syst*. 2024 Apr 30;22(1):55.
- 701 35. Malembaka EB, Karemere H, Bisimwa Balaluka G, Altare C, Odikro MA, Lwamushi  
702 SM, et al. Are people most in need utilising health facilities in post-conflict settings? A cross-  
703 sectional study from South Kivu, eastern DR Congo. *Glob Health Action*. 2020;13(1).
- 704 36. World Health Organization. *People-Centred Care in Low- and Countries*. Proceedings  
705 of the Third Geneva Conference on Person-Centered Care; Geneva, Switzerland. *World*  
706 *Health Organ Health Innov Netw South Lond*. 2010;(May):1–25.
- 707 37. Molima Eboma Ndjangulu C, Karemere H, Bisimwa G, Makali S, Mwene-Batu P,  
708 Bwenge Malembaka E, et al. Barriers and facilitators in the implementation of bio-  
709 psychosocial care at the primary healthcare level in South Kivu, Democratic Republic of  
710 Congo. *Afr J Prim Health Care Fam Med*. 2021;13:a2608.
- 711 38. Rao KD, Mehta A, Noonan C, Peters MA, Perry H. Voting with their feet: Primary  
712 care provider choice and its implications for public sector primary care services in India. *Soc*  
713 *Sci Med*. 2024 Jan 1;340:116414.



- 714 39. Berman P, Mann C, Ricculi ML. Can Ethiopia finance the continued development of  
715 its primary health care system if external resources decline? *Health Syst Reform*.  
716 2018;4(3):227–38.
- 717 40. Bräutigam D. *Aid dependence and governance*. Vol. 1. Almqvist & Wiksell  
718 International Stockholm; 2000.
- 719 41. Moss TJ, Pettersson G, van de Walle N. *An Aid-Institutions Paradox? A*  
720 *Review Essay on Aid Dependency and State Building in Sub-Saharan Africa* [Internet].  
721 Rochester, NY; 2006 [cited 2023 Feb 23]. Available from: <https://hdl.handle.net/1813/55015>
- 722 42. Barroy H, André F, Mayaka S, Samaha H. *Investing in Universal Health Coverage :*  
723 *Opportunities and Challenges for Health Financing in the Democratic Republic of Congo*.  
724 2014 [cited 2024 Jan 8]; Available from:  
725 <https://agris.fao.org/search/en/providers/122582/records/6474821dbf943c8c7988adf0>
- 726 43. Ifeagwu SC, Yang JC, Parkes-Ratanshi R, Brayne C. Health financing for universal  
727 health coverage in Sub-Saharan Africa: a systematic review. *Glob Health Res Policy*. 2021  
728 Dec;6(1):8.
- 729 44. Bosongo S, Belrhiti Z, Chenge F, Criel B, Coppieters Y, Marchal B. The role of  
730 provincial health administration in supporting district health management teams in the  
731 Democratic Republic of Congo: eliciting an initial programme theory of a realist evaluation.  
732 *Health Res Policy Syst*. 2024 Feb 20;22(1):29.
- 733 45. Swanson RC, Atun R, Best A, Betigeri A, de Campos F, Chunharas S, et al.  
734 *Strengthening health systems in low-income countries by enhancing organizational capacities*  
735 *and improving institutions*. *Glob Health*. 2015;11:1–8.
- 736 46. Emmel N, Monaghan M, Manzano A, Greenhalgh J. *Doing realist research*. 2018;
- 737 47. Mukumbang FC. *A realist evaluation of the antiretroviral treatment adherence club*  
738 *programme in the metropolitan area of the Western Cape Province, South Africa*. 2018;

- 739 48. Barasa E, Boga M, Kagwanja N, Kinyanjui S, Molyneux C, Nyikuri M, et al. Learning  
740 sites for health system governance in Kenya and South Africa: reflecting on our experience.  
741 Health Res Policy Syst. 2020 May 11;18(1):44.
- 742 49. Belrhiti Z, Booth A, Marchal B, Verstraeten R. To what extent do site-based training,  
743 mentoring, and operational research improve district health system management and  
744 leadership in low-and middle-income countries: a systematic review protocol. Syst Rev.  
745 2016;5:1–10.
- 746 50. Kieny MP, Evans DB, Schmets G, Kadandale S. Health-system resilience: reflections  
747 on the Ebola crisis in western Africa. Vol. 92, Bulletin of the World Health Organization.  
748 SciELO Public Health; 2014.
- 749 51. Atun R, De Andrade LOM, Almeida G, Cotlear D, Dmytraczenko T, Frenz P, et al.  
750 Health-system reform and universal health coverage in Latin America. The Lancet.  
751 2015;385(9974):1230–47.
- 752 52. Meyor C. La phénoménologie dans la méthode scientifique et le problème de la  
753 subjectivité. Rech Qual. 2005;25(1):25.
- 754

INPUTS

- Mentor
- Financial resources (RIPSEC)
- Technical support:
  - ✓ ERSP-UCB
  - ✓ South-Kivu Provincial Health Division

PROCESS

Walungu LRZ transformation

- Leadership strengthening:
  - ✓ Key HZMT members
  - ✓ Individual coaching
  - ✓ Weekly meetings
  - ✓ Exchange of experience
- Supportive activities :  
Leadership training, formative supervision, reference-counter-reference, HFs transformation

OUTPUTS

- HZMT leadership Strengthened leading to :
- ↑ Functionality
  - ↑ Performance
  - ↓ IHFs

# Curative Services Utilization Rate

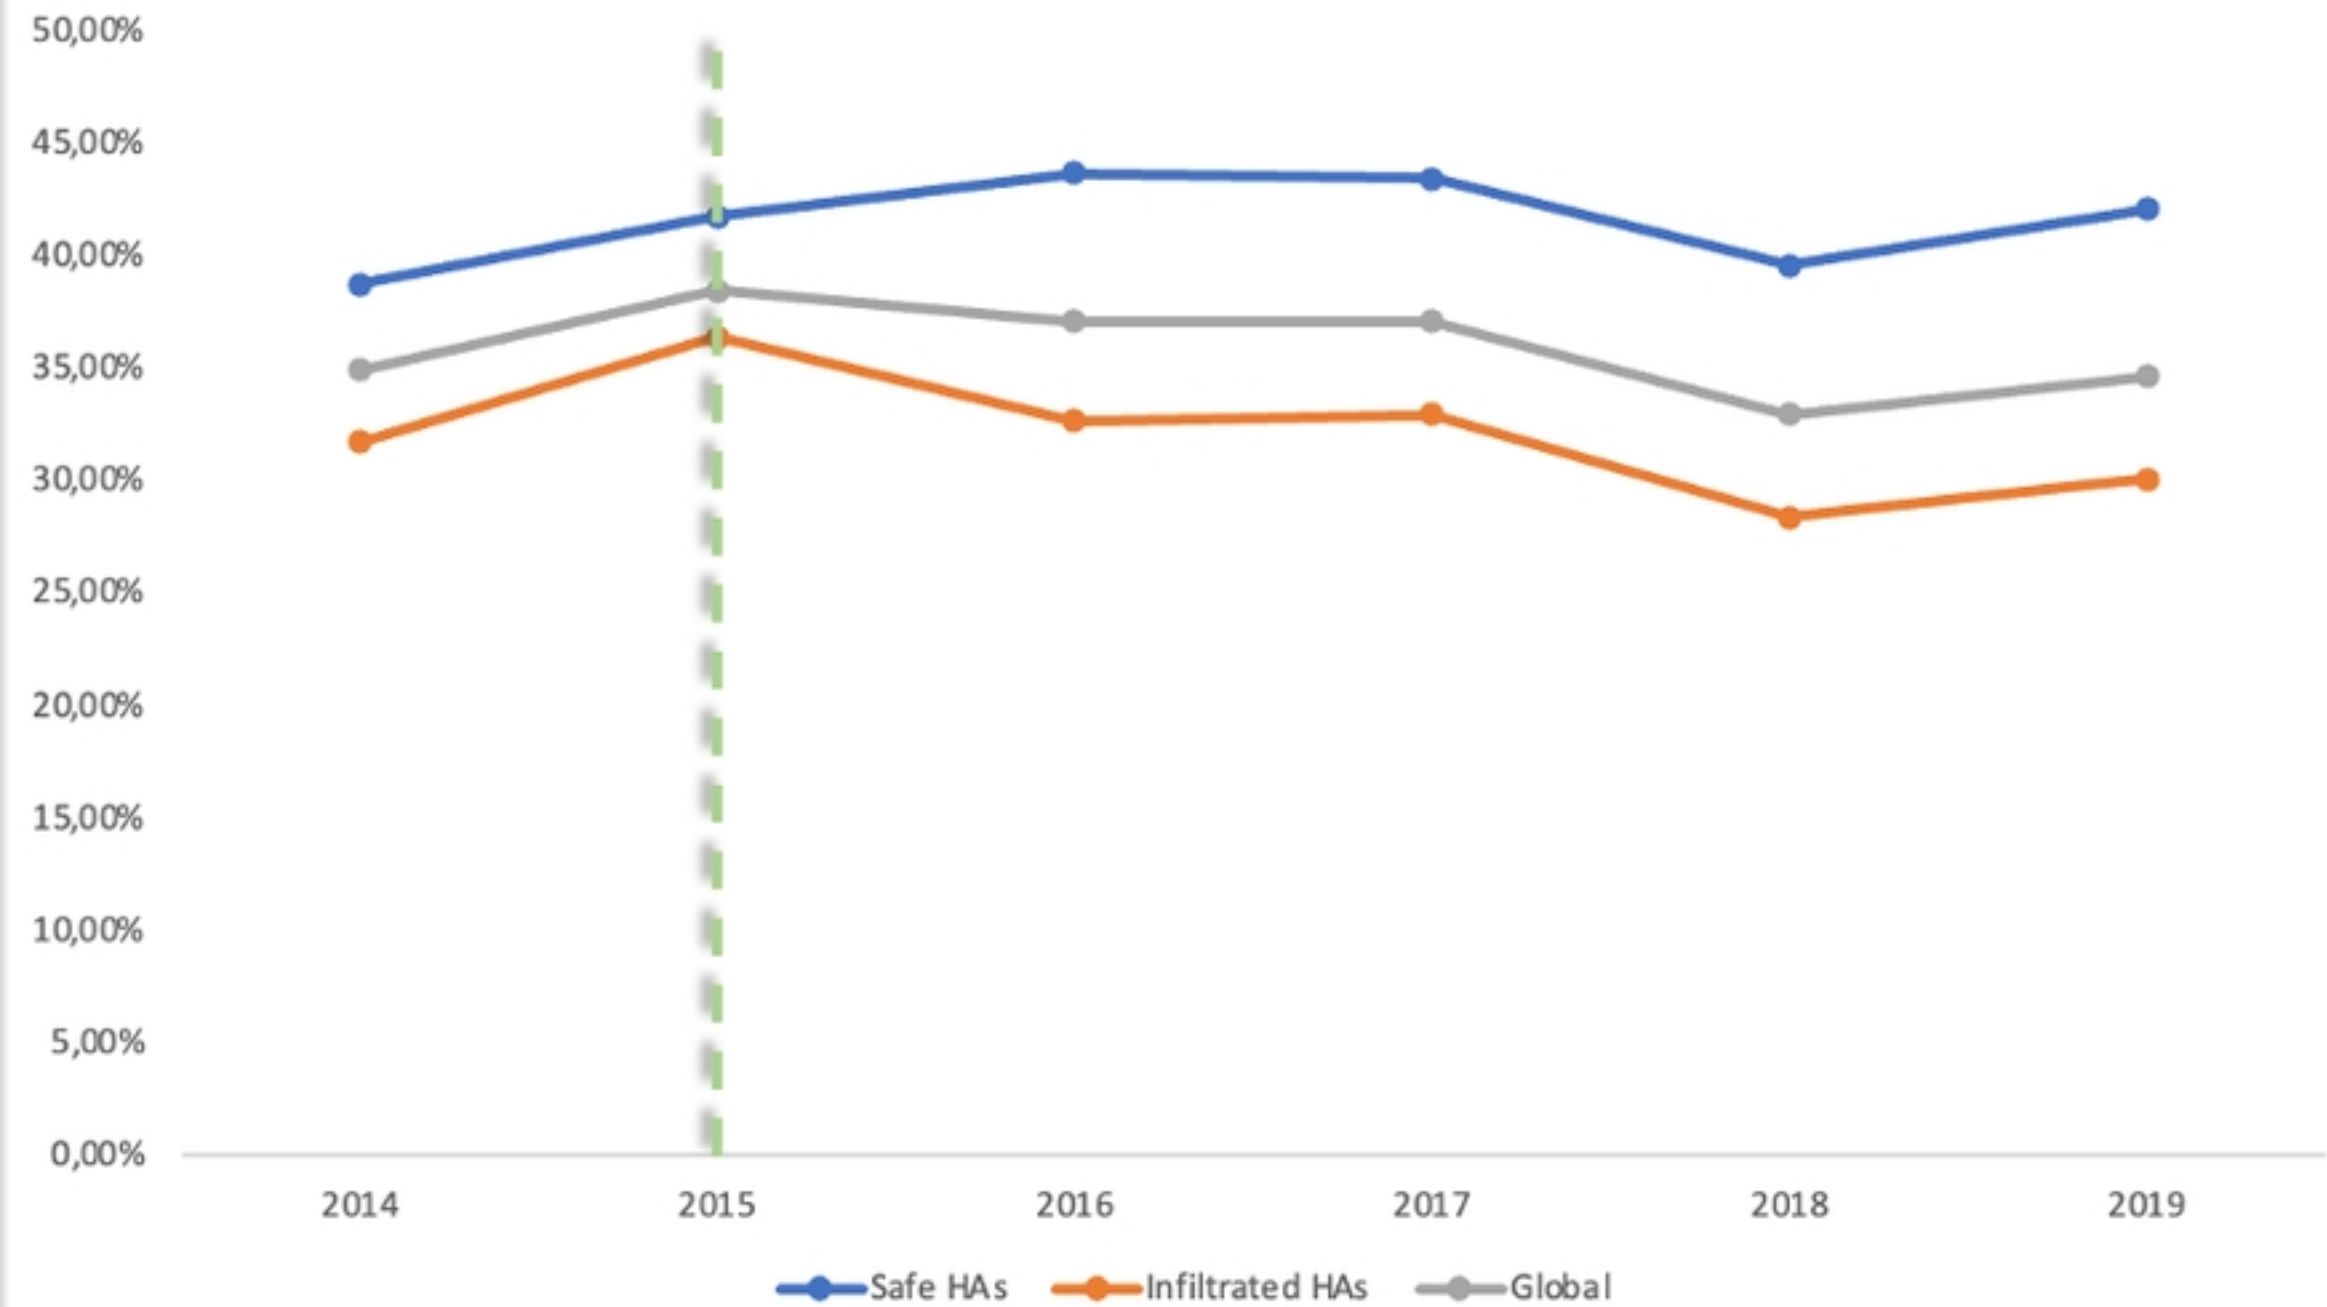

Figure

## Curative, Preventive and Managerial activities trends

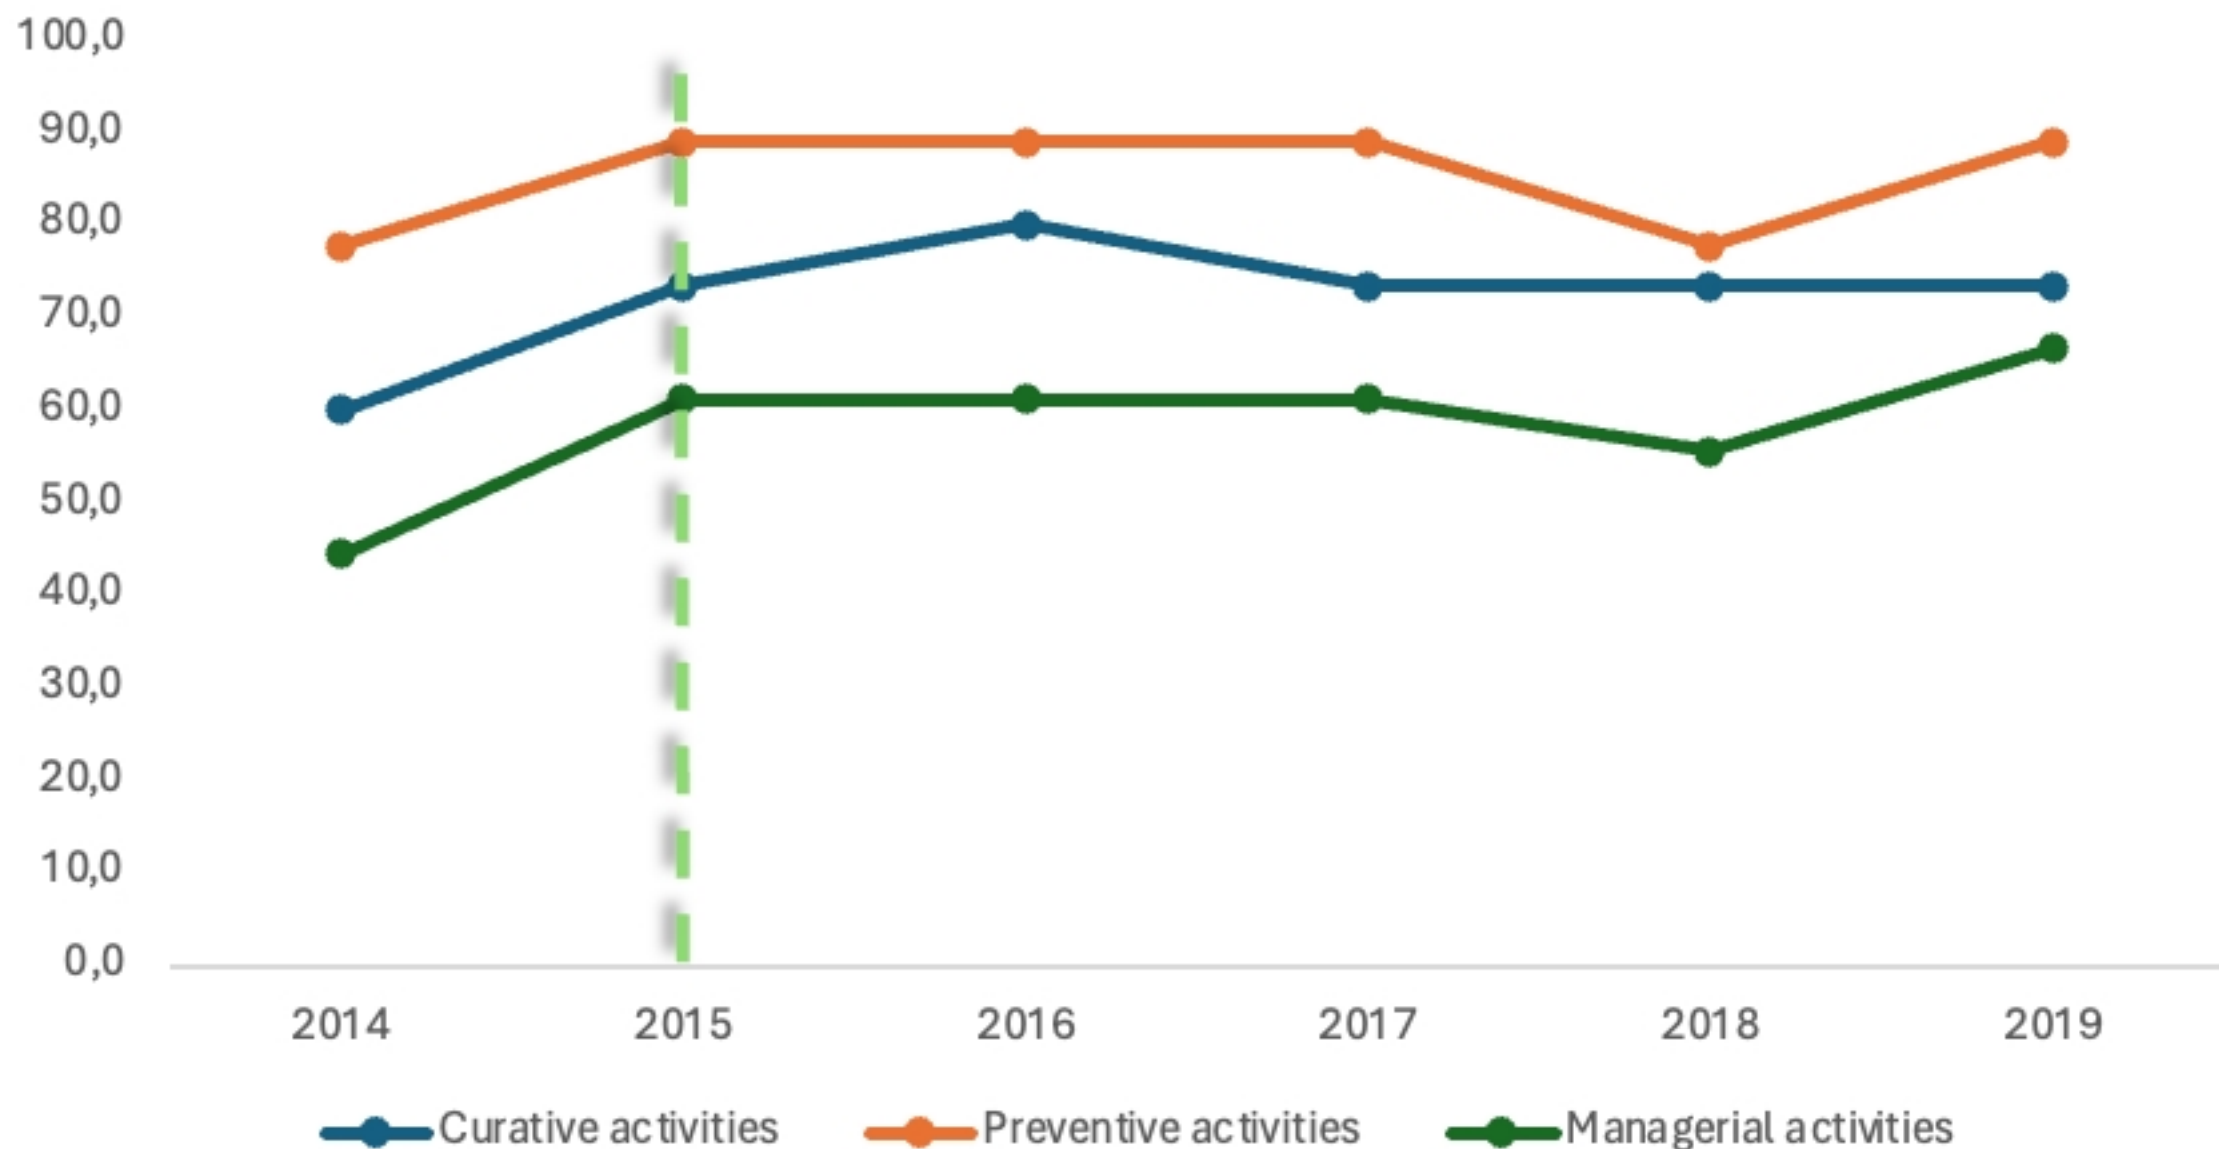

Figure

## Functionality and performance trends

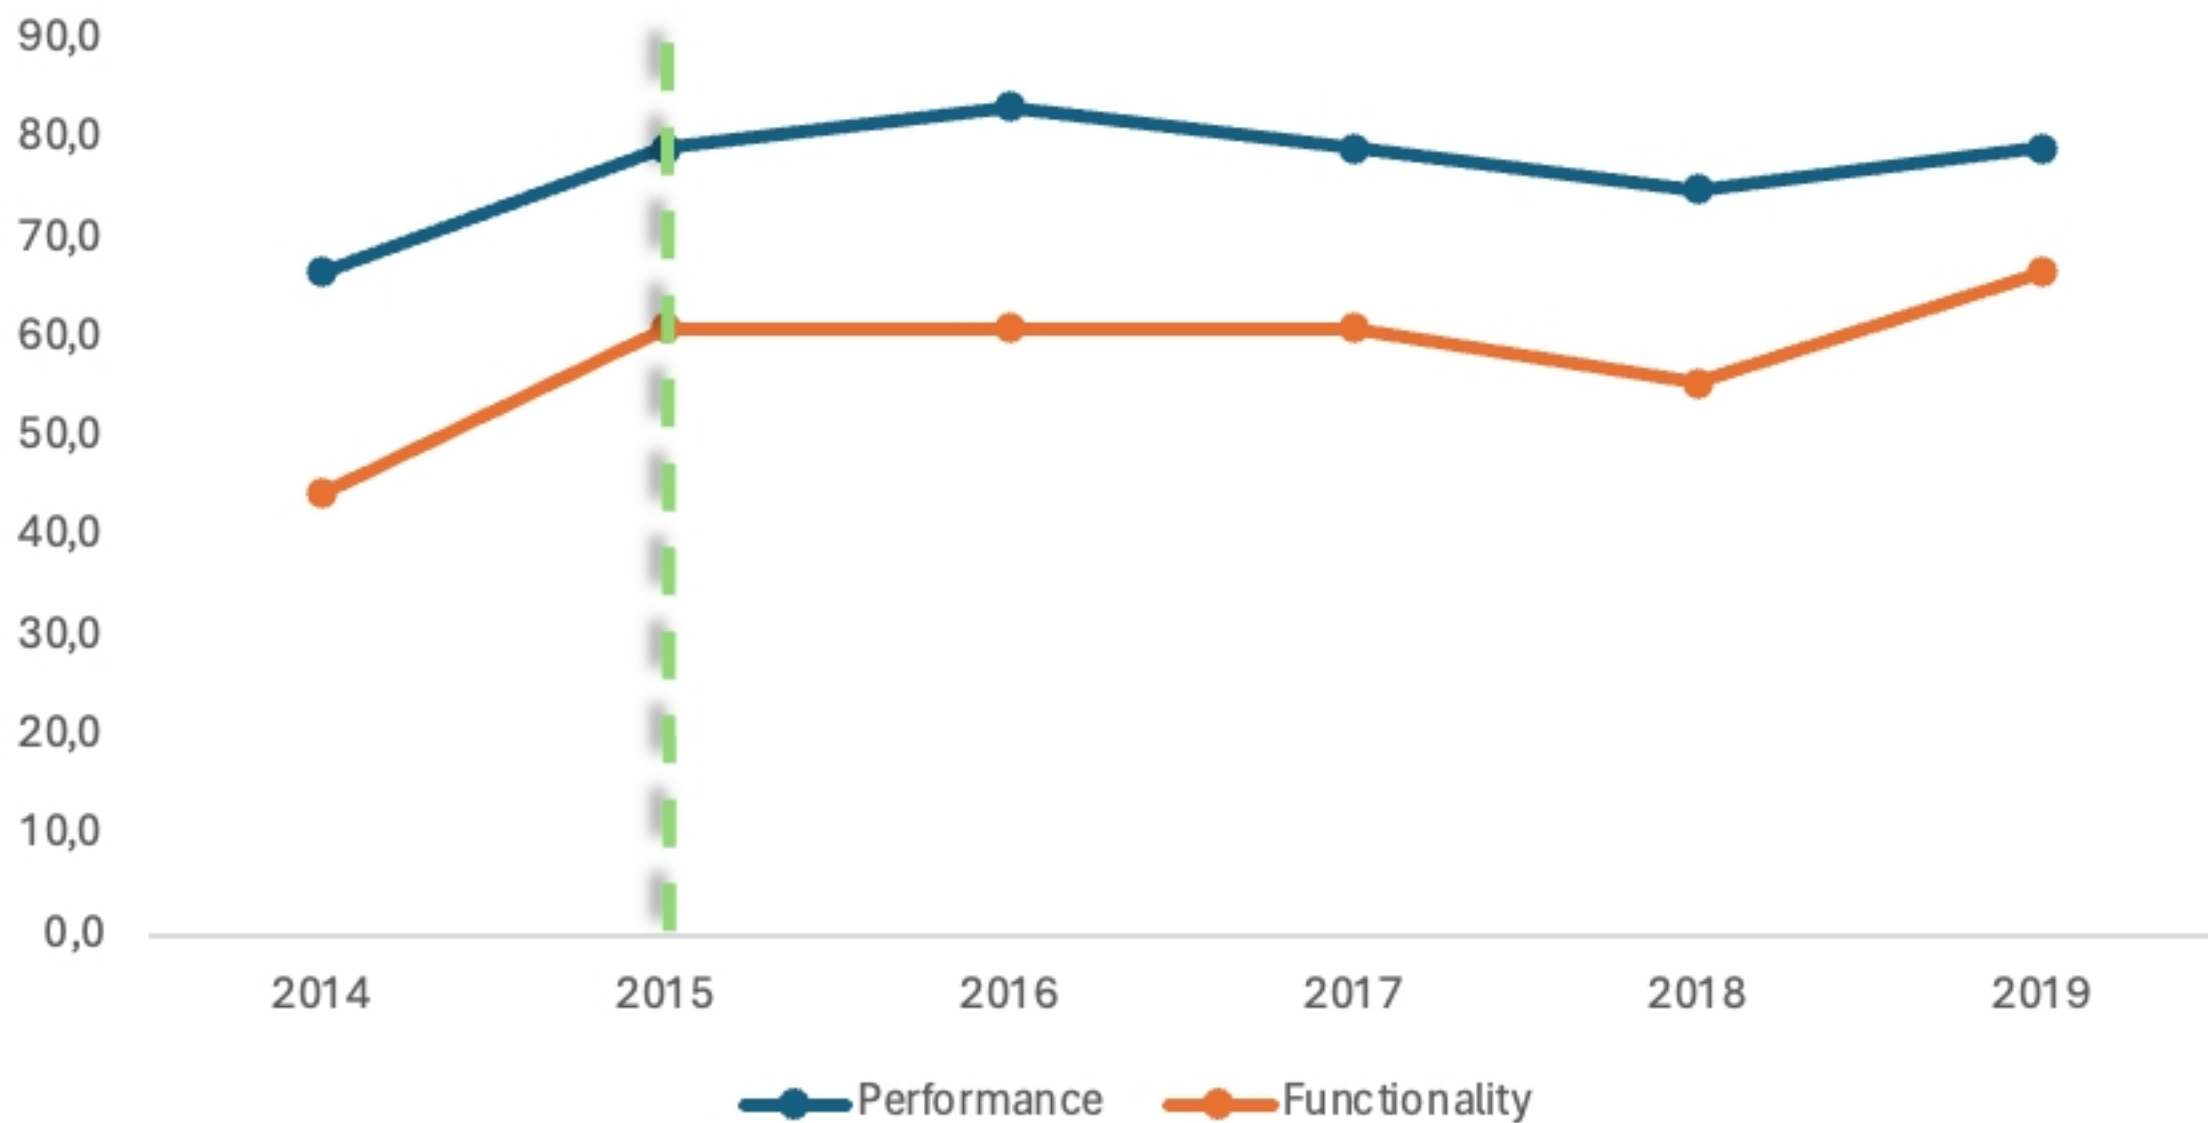

Figure
